# Supplementary material for: Tuning the Lewis acidity of ZrO2 for efficient conversion of CH4 and CO2 into acetic acid
Source: Royal Society of Chemistry journal article supplement (doi:10.1039/d1nj00794g), 2021-01-01
Supplement: d1nj00794g1.pdf [file d1nj00794g1.pdf]

## Supporting Information:

### Tuning the Lewis acidity of ZrO<sub>2</sub> for efficient conversion of CH<sub>4</sub> and CO<sub>2</sub> into acetic acid

Yufeng Li<sup>1,†</sup>, Bing Liu<sup>1,†</sup>, Jie Liu<sup>1</sup>, Ting Wang<sup>1</sup>, Yu Shen<sup>2</sup>, Ke Zheng<sup>1</sup>, Feng Jiang<sup>1</sup>, Yuebing Xu<sup>1</sup>,  
and Xiaohao Liu<sup>1,\*</sup>

<sup>1</sup>*Department of Chemical Engineering, School of Chemical and Material Engineering, Jiangnan University, 214122 Wuxi, Jiangsu, P.R. China*

<sup>2</sup>*School of biotechnology, Jiangnan University, 214122 Wuxi, Jiangsu, P.R. China*

#### Corresponding authors:

\*Email for X. Liu: [liuxh@jiangnan.edu.cn](mailto:liuxh@jiangnan.edu.cn)

†These authors contributed equally to this work.

## Supporting method

### Temperature-programmed desorption measurements

Temperature-programmed desorption measurements of  $\text{NH}_3$  ( $\text{NH}_3$ -TPD) was performed on an automated chemisorption analyzer (TP5076 TPD/TPR) equipped with a TCD. Before each TPD experiments, 200 mg of sample was charged into the quartz tube and flushed with  $\text{N}_2$  at 500 °C for 1 h following by cooling down to 40°C. Ammonia was adsorbed by exposing sample to a 10%  $\text{NH}_3/\text{Ar}$  (30 mL/min) for 1h at 40°C and then purged with helium at this temperature for 30 min to desorb physically adsorbed ammonia. Desorption of ammonia was carried out in flowing He (30 mL/min) by increasing the temperature to 700 °C with a heating rate of 10°C/min.

For CO-TPD, 200 mg of sample was first pretreated in  $\text{N}_2$  at 500°C for 1 h following by cooling down to 40°C. The sample was exposed in a flow of 5%CO/Ar (30 mL/min) for 1h at 40°C and then purged with helium at this temperature for 30 min. Finally, the sample was heated to 700°C (for CO desorption) with a heating rate of 10 K·min<sup>-1</sup> in He flow (30 mL·min<sup>-1</sup>).

For  $\text{CO}_2$ -TPD, 200 mg of sample was first pretreated in  $\text{N}_2$  at 500°C for 1 h following by cooling down to 40°C. The sample was exposed in a flow of 20% $\text{CO}_2/\text{Ar}$  (30 mL/min) for 1h at 40°C and then purged with helium at this temperature for 30 min. Finally, the sample was heated to either 900°C for  $\text{CO}_2$  desorption or 700°C with a heating rate of 10°C·min<sup>-1</sup> in He flow (30 mL·min<sup>-1</sup>).

Sulfate species on SZ would be decomposed to produce sulfur oxides at high temperatures. To distinguish the contribution of decomposed products of SZ during the TCD measurements, temperature-programmed decomposition measurements were also performed. The sample was pretreated in  $\text{N}_2$  at 500°C for 1h, cooled down to 40°C and heated to 900°C with a heating rate of 10 °C·min<sup>-1</sup> in He flow (30 mL·min<sup>-1</sup>). The corresponding temperature-programmed decomposition curves are shown as dashed lines in Fig. 7a.

**Table S1.** Physicochemical properties of various catalysts.

| Sample           | Sulfur content <sup>a</sup> (wt %) | Sulfur content <sup>b</sup> (wt %) | BET surface area <sup>c</sup> (m <sup>2</sup> /g) | Pore size <sup>d</sup> (nm) | Pore volume <sup>d</sup> (cm <sup>3</sup> /g) |
|------------------|------------------------------------|------------------------------------|---------------------------------------------------|-----------------------------|-----------------------------------------------|
| ZrO <sub>2</sub> | --- <sup>e</sup>                   | --- <sup>e</sup>                   | 38.99                                             | 17.1                        | 0.167                                         |
| SZ-1             | 5.83                               | 10.14                              | 47.42                                             | 5.73                        | 0.068                                         |
| SZ-2             | 8.17                               | 12.82                              | 7.06                                              | 10.7                        | 0.019                                         |
| SZ-3             | 10.72                              | 15.52                              | 3.29                                              | 10.7                        | 0.009                                         |

<sup>a</sup> Analyzed by ICP-OES.

<sup>b</sup> Analyzed by XPS.

<sup>c</sup> Calculated by N<sub>2</sub> sorption data.

<sup>d</sup> Calculated using the BJH formalism from the N<sub>2</sub> adsorption (or desorption) branch isotherm.

<sup>e</sup> Sulfur was not detected.

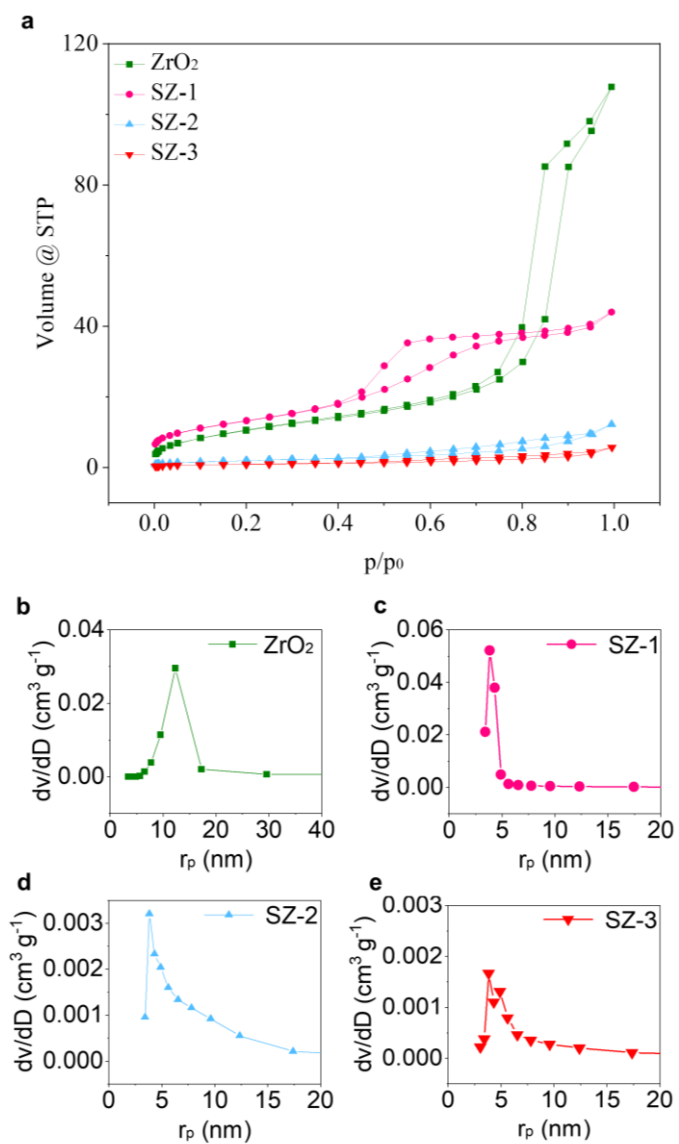

**Fig. S1** N<sub>2</sub> adsorption-desorption isotherm curves (a); BJH pore size distribution curves (b-e).

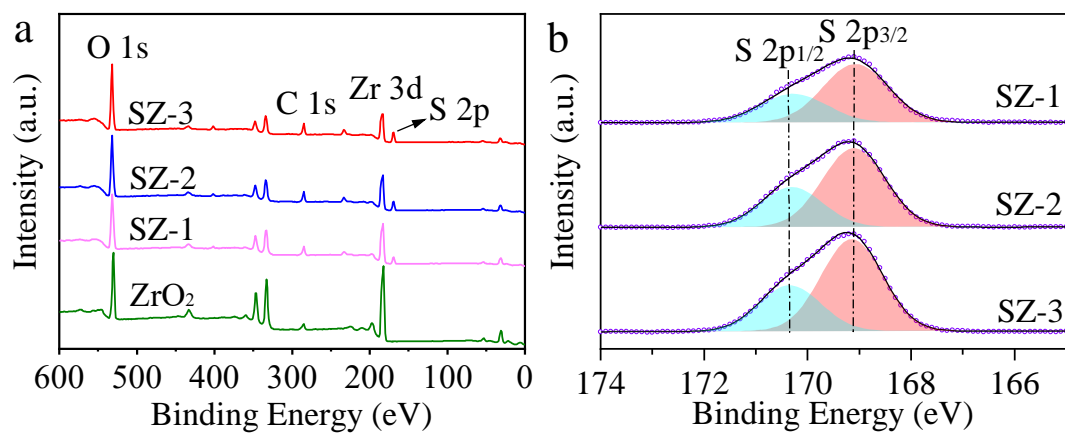

**Fig. S2** Survey (a) and S 2p (b) XPS spectra of ZrO<sub>2</sub> and SZ catalysts.

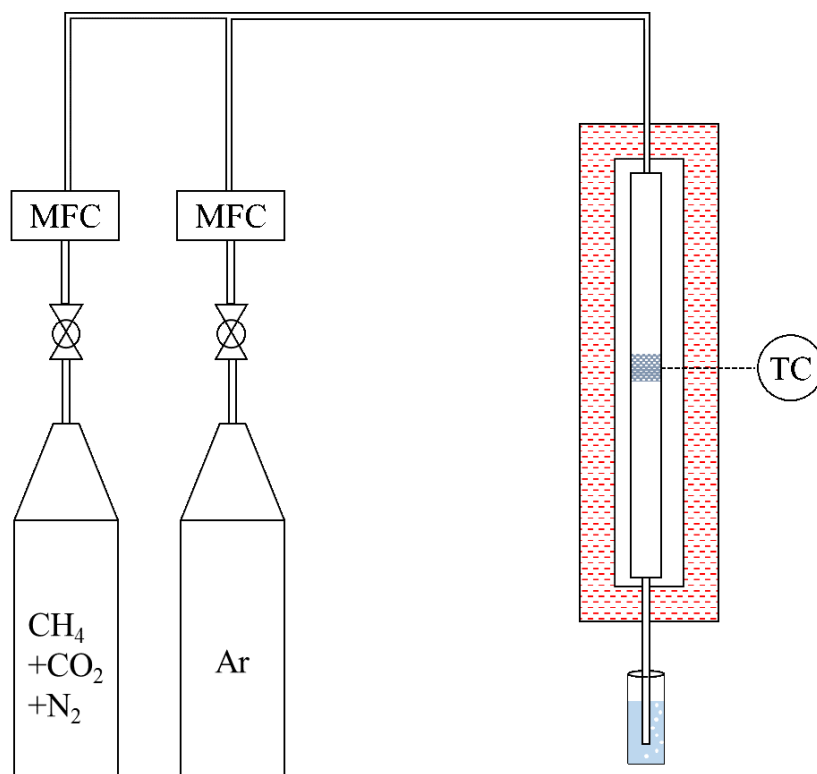

**Fig. S3** The schematic of reactor for conversion of  $\text{CH}_4$  and  $\text{CO}_2$  into acetic acid.

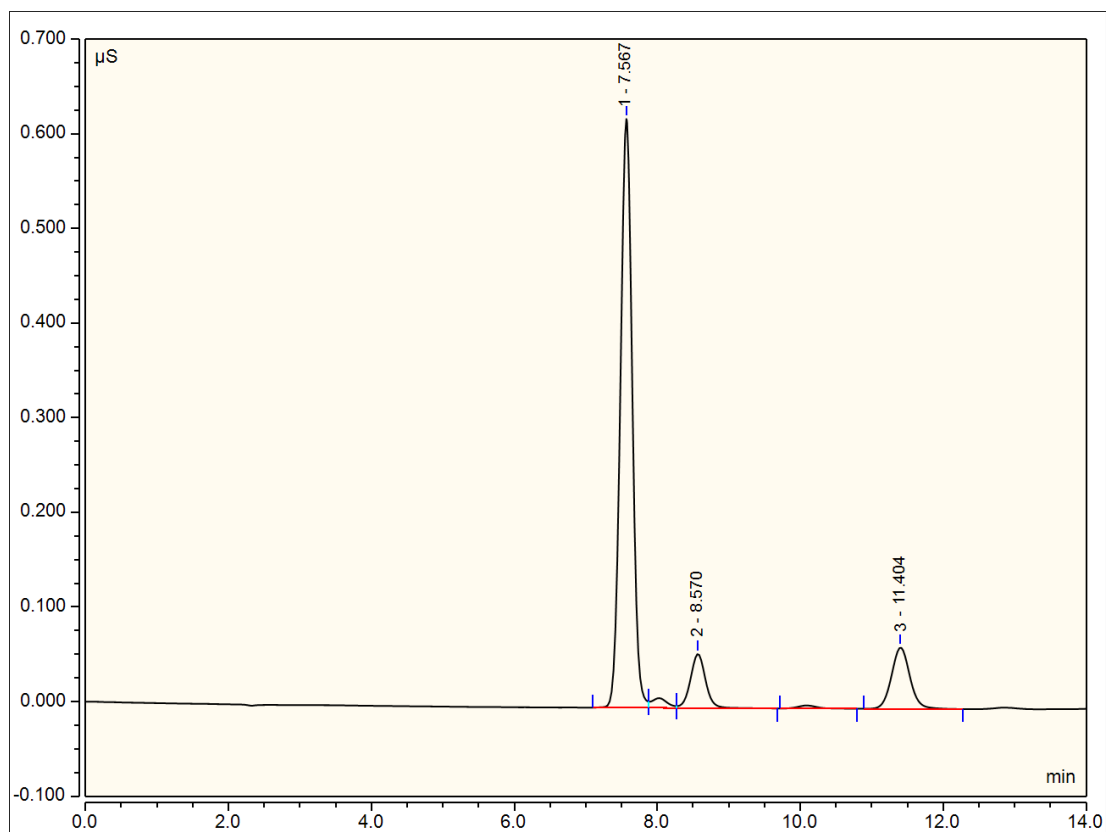

**Fig. S4** A typical ion chromatography spectrum obtained from the co-conversion of  $\text{CH}_4$  and  $\text{CO}_2$  on SZ-3. The main chromatographic peaks with the retention time at 7.567, 8.570 and 11.404 min were identified as fluoride, acetate and formate ion, respectively.

**Table S2.** Catalytic performance of various catalysts.

| Entry | Catalysts                     | Acetic acid/ $\mu\text{g}$ | Formic acid/ $\mu\text{g}$ | Total products/ $\mu\text{g}$ |
|-------|-------------------------------|----------------------------|----------------------------|-------------------------------|
| 1     | ZrO <sub>2</sub> <sup>a</sup> | 0.0248                     | 0.003                      | 0.0278                        |
| 2     | SZ-1 <sup>a</sup>             | 0.1697                     | 0.0624                     | 0.2321                        |
| 3     | SZ-2 <sup>a</sup>             | 0.2423                     | 0.0552                     | 0.2975                        |
| 4     | SZ-3 <sup>a</sup>             | 0.3557                     | 0.0687                     | 0.4244                        |
| 5     | SZ-3 <sup>b</sup>             | 0                          | 0                          | 0                             |
| 6     | SZ-3 <sup>c</sup>             | 0.0849                     | 0.1812                     | 0.2661                        |

<sup>a</sup> Reaction conditions: 1 atm, 500 °C, CH<sub>4</sub>: CO<sub>2</sub>: N<sub>2</sub>=45: 45: 10, 3000 cm<sup>3</sup>h<sup>-1</sup>g<sub>cat</sub><sup>-1</sup>

<sup>b</sup> Reaction conditions: 1 atm, 500 °C, pure CO<sub>2</sub>, 3000 cm<sup>3</sup>h<sup>-1</sup>g<sub>cat</sub><sup>-1</sup>

<sup>c</sup> Reaction conditions: 1 atm, 500 °C, pure CH<sub>4</sub>, 3000 cm<sup>3</sup>h<sup>-1</sup>g<sub>cat</sub><sup>-1</sup>



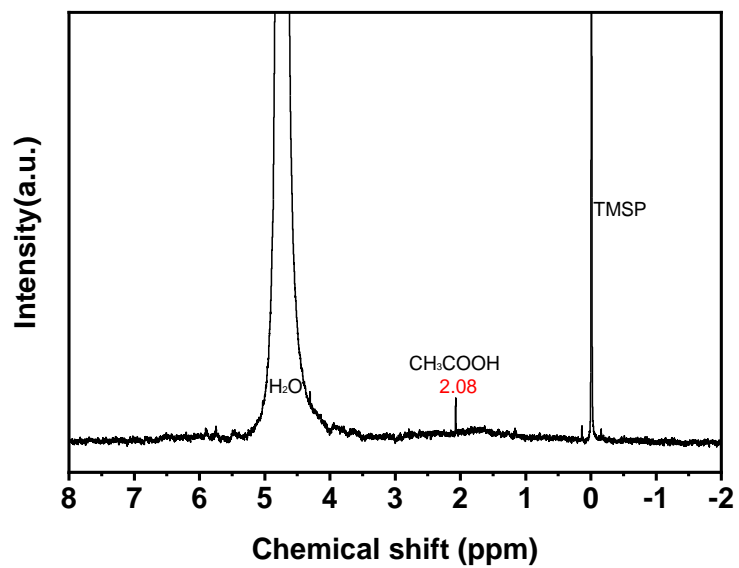

**Fig. S5**  $^1\text{H}$  NMR spectrum obtained from the co-conversion of  $\text{CH}_4$  and  $\text{CO}_2$  on SZ-3. Chemical shift of 2.08 ppm proves the formation of acetic acid.

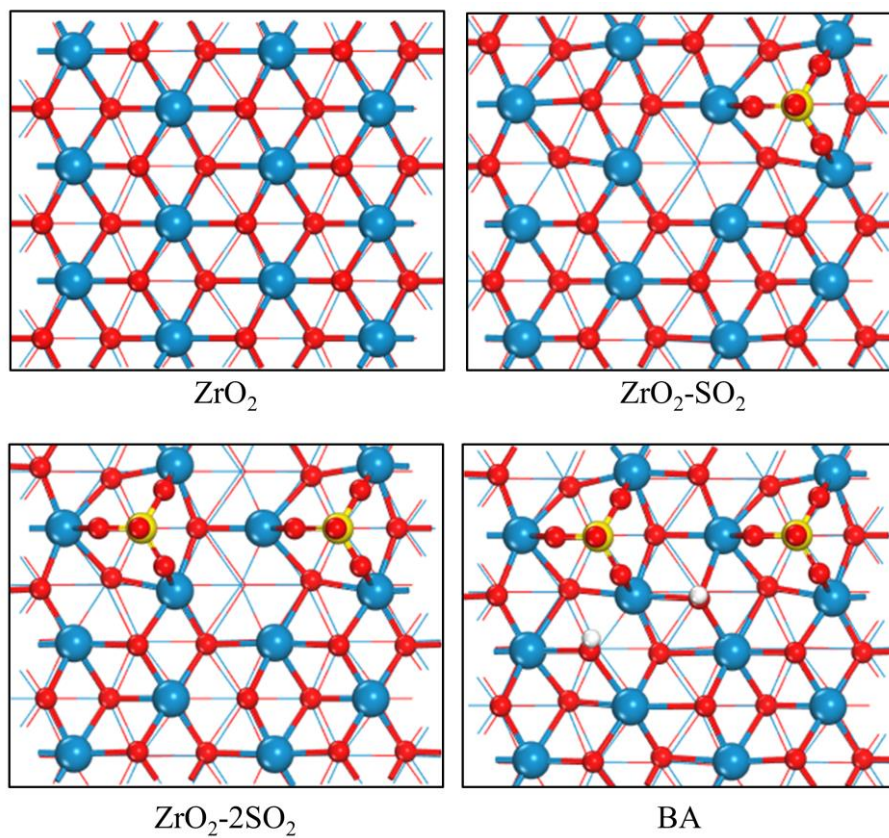

**Fig. S6** Structural models of  $ZrO_2$ ,  $ZrO_2-SO_2$ ,  $ZrO_2-2SO_2$  and BA in the DTF calculations.

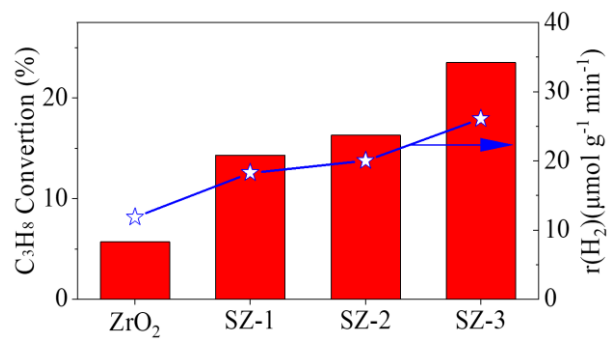

**Fig. S7** PDH reaction over all catalysts. Reaction condition:  $T=550^{\circ}\text{C}$ ,  $P=1\text{ atm}$ ,  $t=10\text{ min}$ ,  $\text{C}_3\text{H}_8:\text{N}_2=20:80$ ,  $GHSV=3000\text{ cm}^3\text{h}^{-1}\text{g}_{\text{cat}}^{-1}$ .

**Table S3.** Configurations for conversion  $\text{CH}_4$  and  $\text{CO}_2$  into acetic acid on  $\text{ZrO}_2\text{-2SO}_2$ .

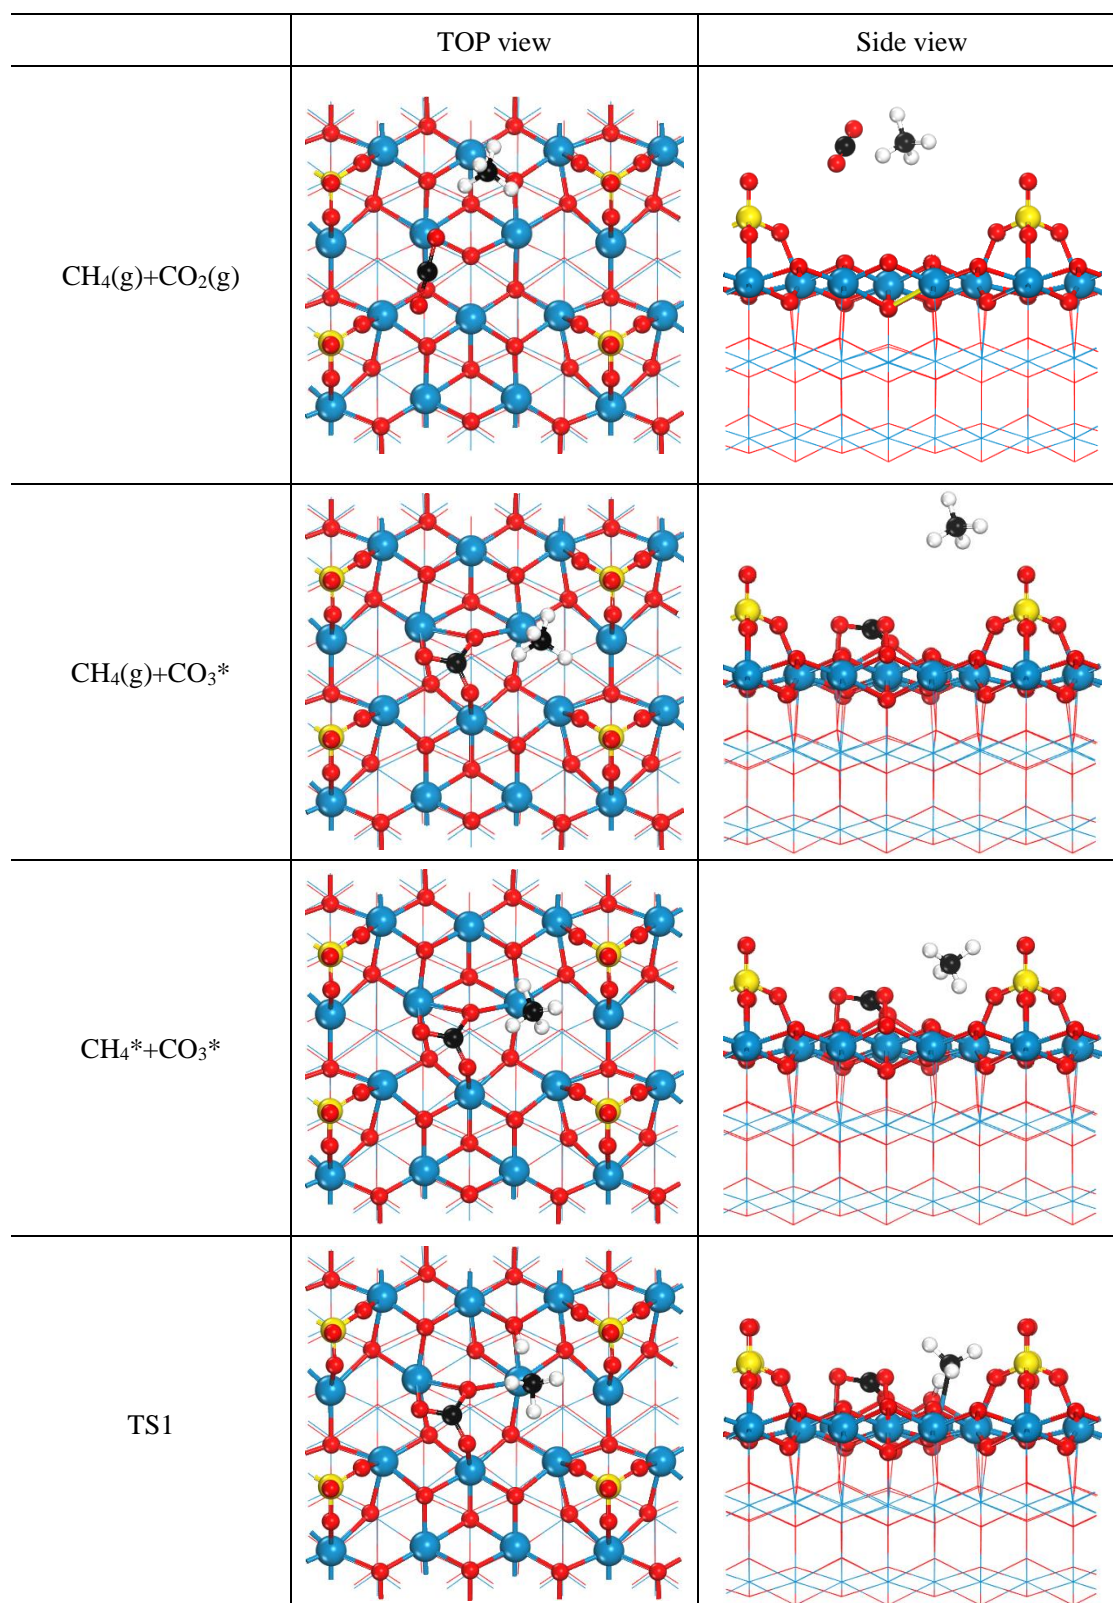

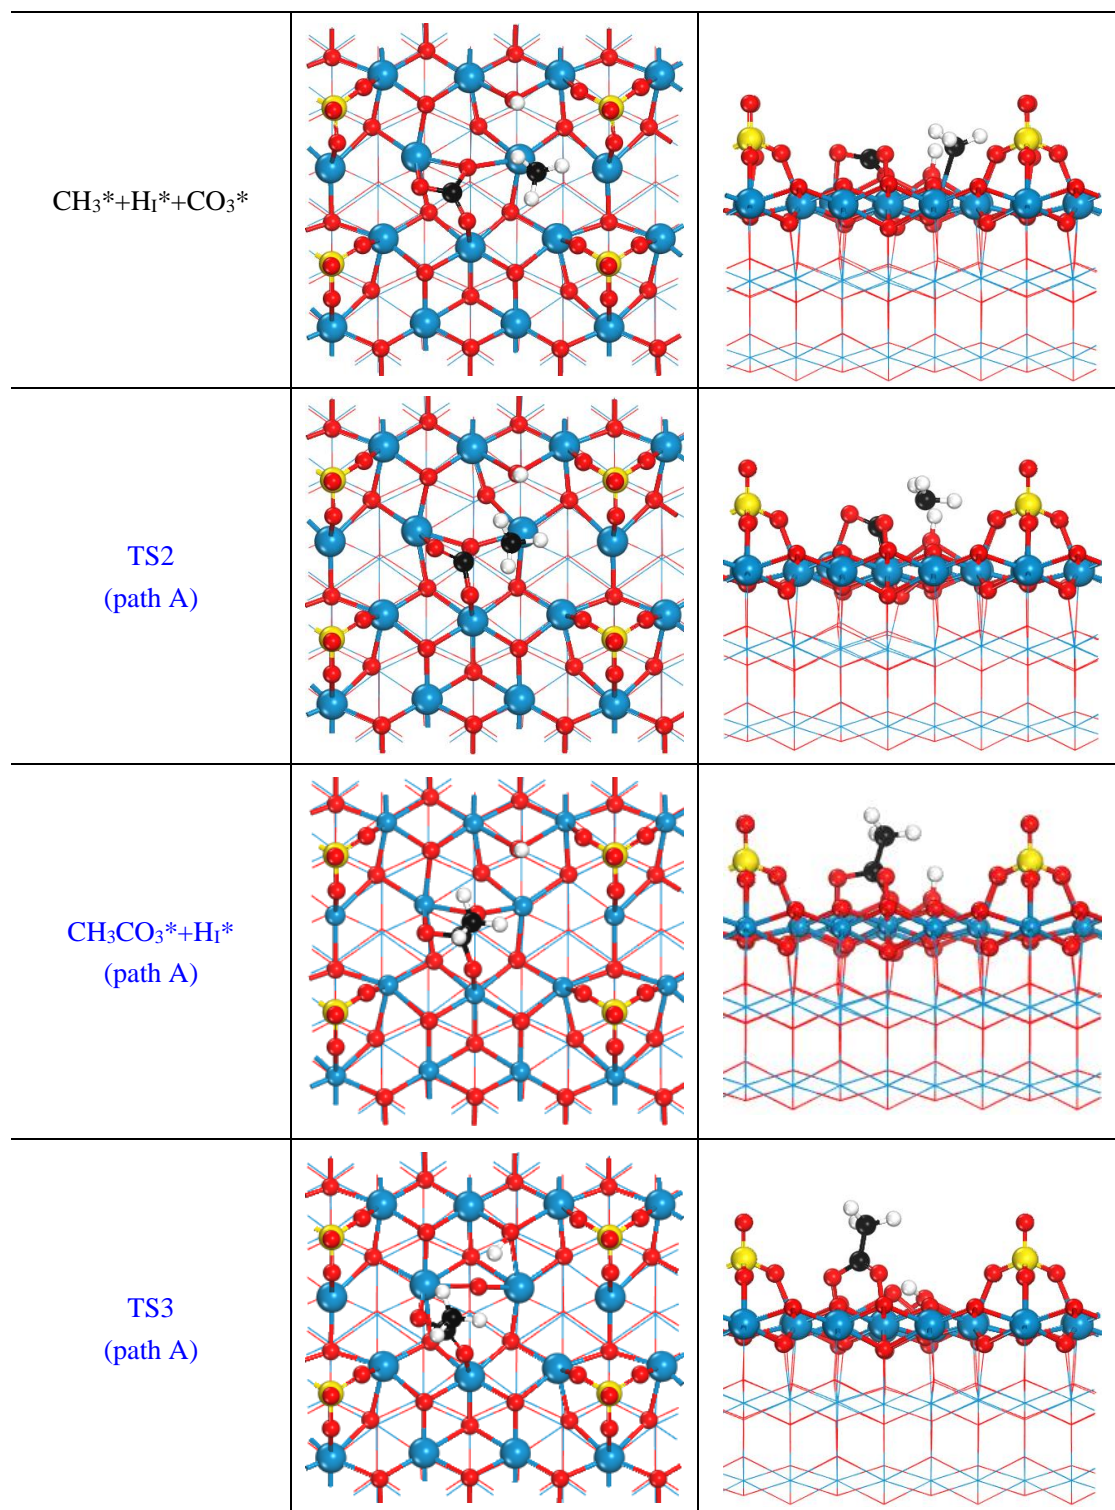

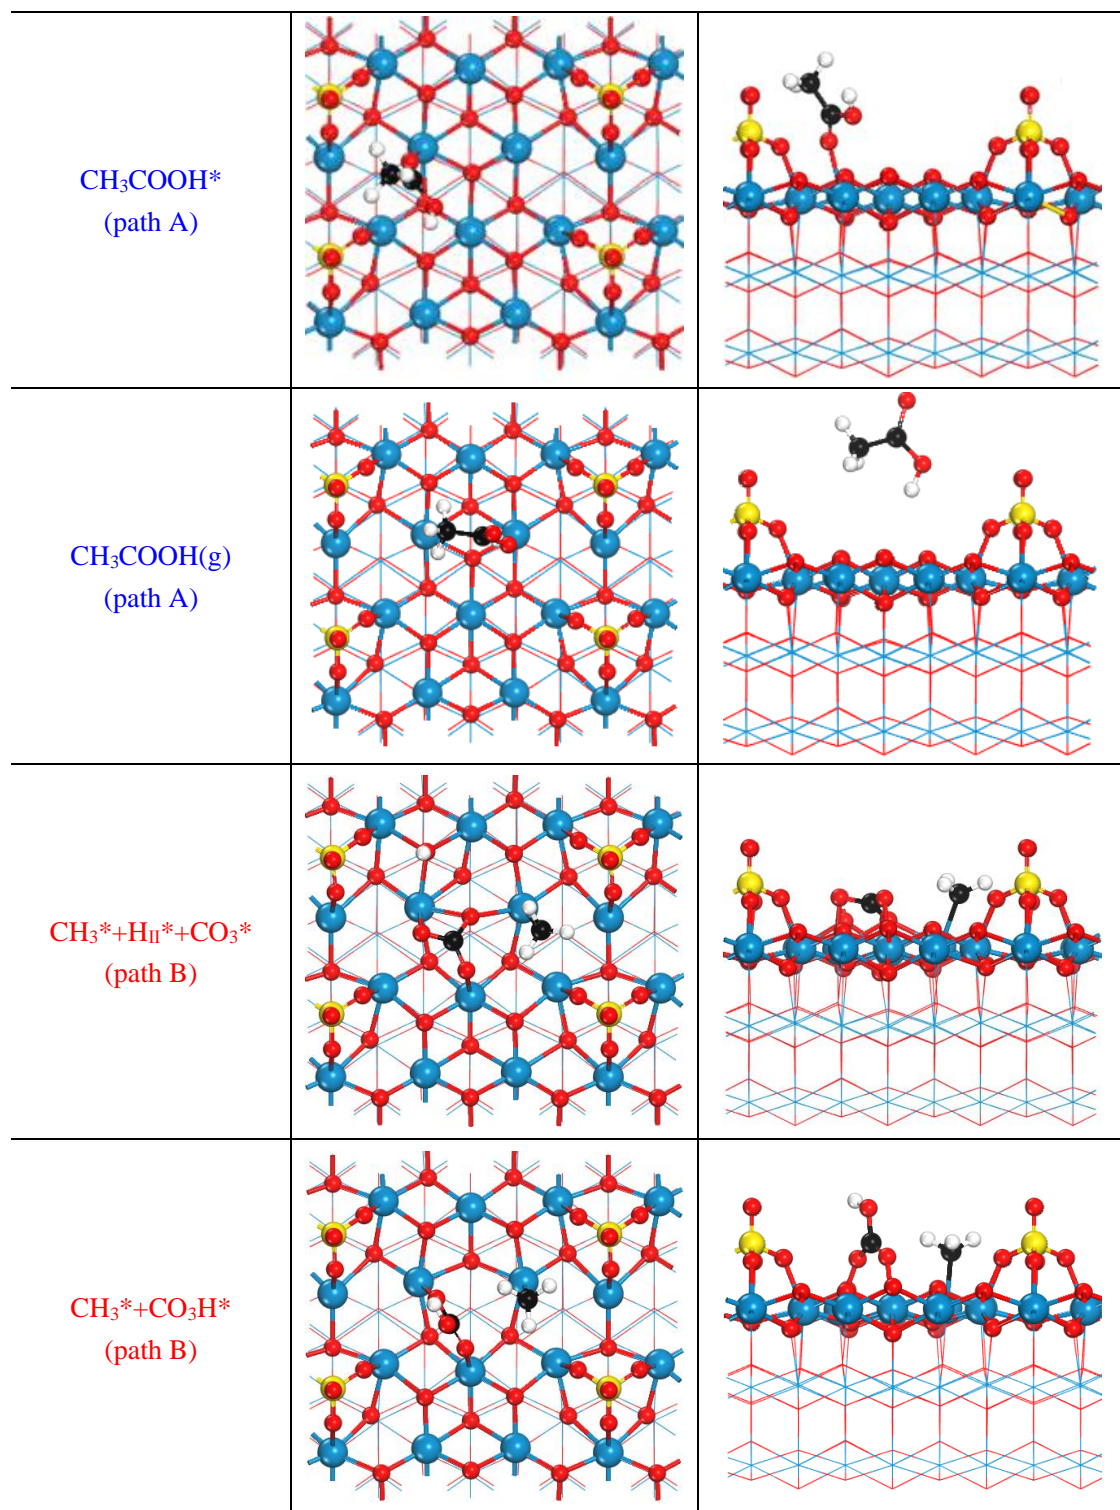

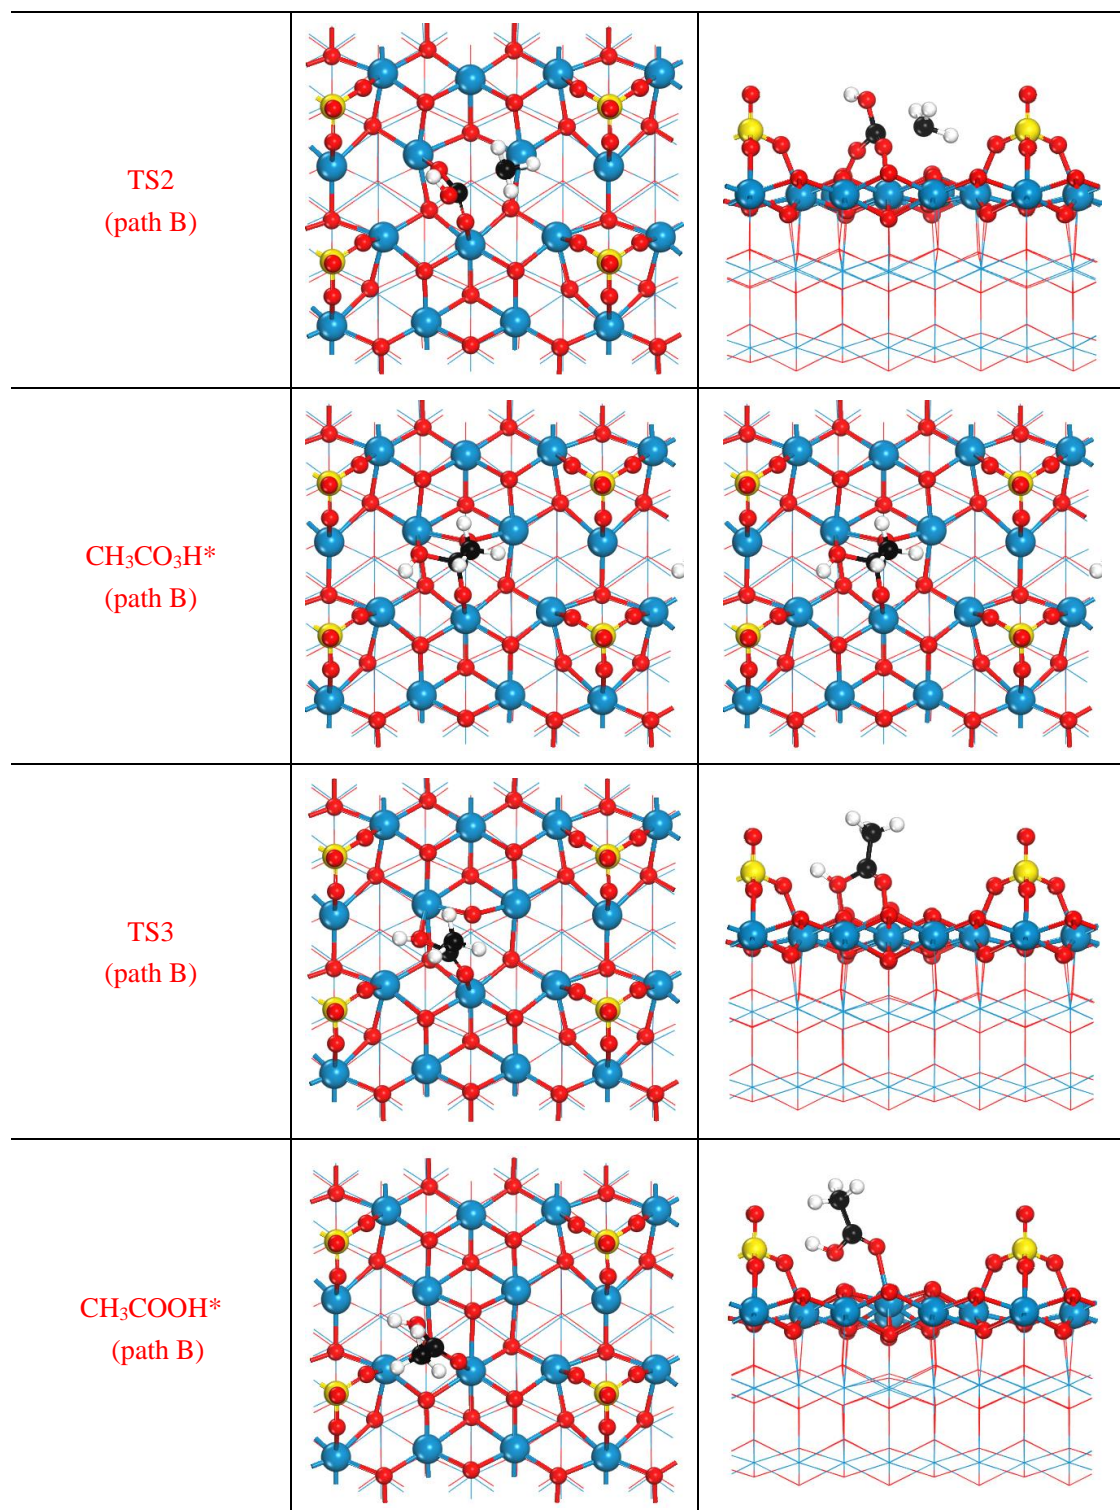

$\text{CH}_3\text{COOH}(\text{g})$   
(path B)

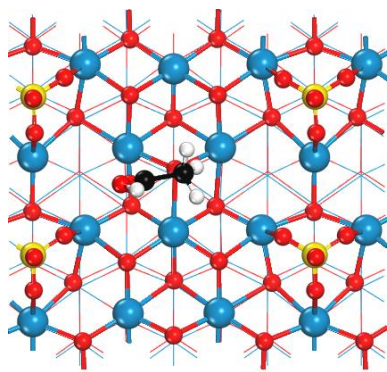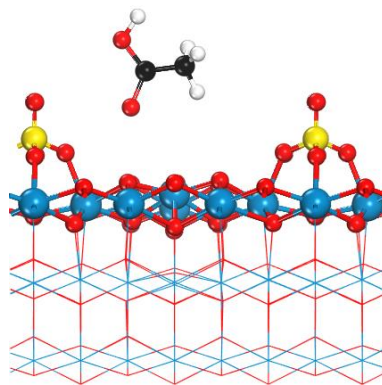



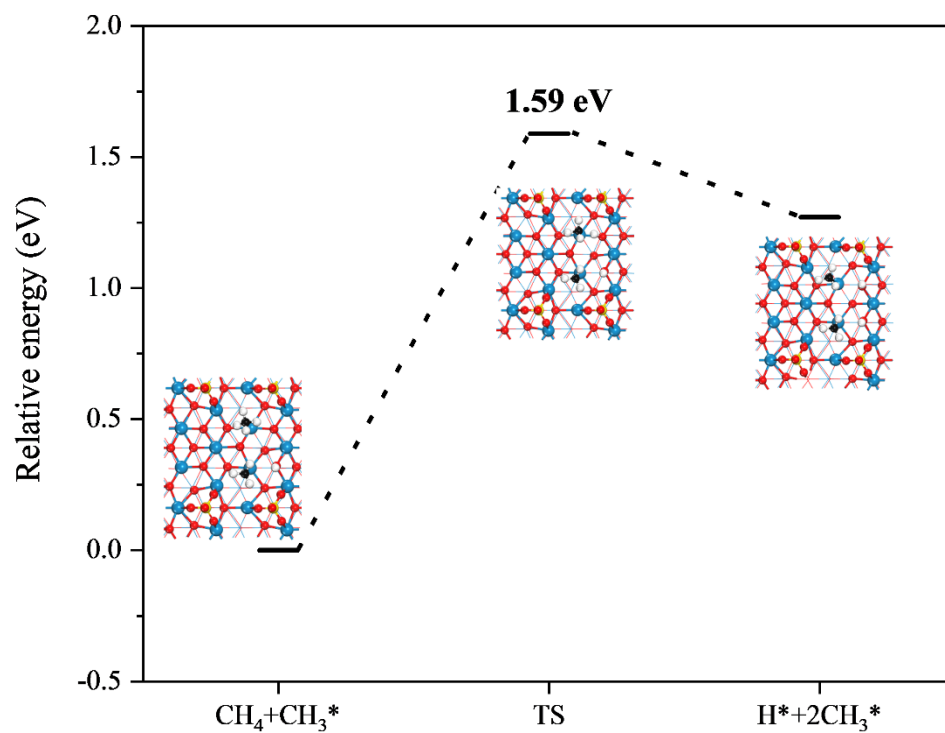

**Fig. S8** Results for the second CH<sub>4</sub> dissociation on ZrO<sub>2</sub>-2SO<sub>2</sub> after the activation of first CH<sub>4</sub>.
